# Supplementary material
Source: Springer Nature journal article supplement (https://www.springermedizin.de/resource/supplementary/12963_2013_232_MOESM4_ESM.pdf/9572440)
Supplement: MOESM4 [file 9572440]

Number of deceased in 2010: n=552,571

Neonatal death certificates: n=2,071 (169 without medical information)  
Death certificates without medical information: n=10,893

Death certificates imported into Iris: n=539,776

- Electronic: n=21,739
- Paper: n=518,037

Unsuitable death certificates: n=5,799

Death certificates analyzed: n=533,977

- Electronic: n=21,259
- Paper: n=512,718
